# Supplementary material for: Global, Regional, and National Burdens of Ischemic Heart Disease attributable to air pollution from 1990 to 2030
Source: Research Square preprint supplement (doi:10.21203/rs.3.rs-5337263/v1), 2024-12-13
Supplement: Supplementary file 1 [file da236ad8738b6dbb864da810.docx]

Supplementary Material

# Supplementary Table

| **Supplementary table 1.**  Mortality and DALY Burden of IHD Due to Air Pollution in 2021 and Temporal Trends from 1990-2021 | | | | | | |
| --- | --- | --- | --- | --- | --- | --- |
|  | Deaths(95%UI) | | | DALYs(95%UI) | | |
|  | No_in_thousands_.95._UI. | ASMRs_per_100000_.95._UI. | EAPC_CI_ASMR | No_in_thousands_.95._UI. | ASRs_per_100000_.95._UI. | EAPC_CI_ASMR |
| Location | No_in_thousands_.95._UI. | ASMRs_per_100000_.95._UI. | EAPC_CI_ASMR | No_in_thousands_.95._UI..1 | ASDRs_per_100000_.95._UI. | EAPC_CI_ASDR |
| Ecuador | 2.1 (1.3,3.2) | 14.4 (8.6,21.4) | -3.63 (-4.23,-3.03) | 41.7 (24.6,62.7) | 262.6 (155.8,393.2) | -3.76 (-4.34,-3.18) |
| Peru | 4.3 (2.8,6.1) | 12.7 (8.2,18.2) | -3.82 (-4.17,-3.47) | 87.3 (56.8,123.7) | 256.1 (166.2,362.6) | -3.74 (-4.09,-3.4) |
| Australia | 1.8 (1,2.6) | 3.4 (1.9,5.1) | -4.13 (-4.67,-3.57) | 27.5 (15.5,40.9) | 59.2 (33.5,87.9) | -4.22 (-4.81,-3.63) |
| New Zealand | 0.3 (0.1,0.5) | 3.1 (1.2,5.2) | -3.97 (-4.29,-3.64) | 4.5 (1.8,7.6) | 52.7 (20.5,89) | -4.39 (-4.78,-4.01) |
| Antigua and Barbuda | 0 (0,0) | 13.2 (5,23.8) | -2.01 (-2.26,-1.77) | 0.2 (0.1,0.4) | 240.9 (91.2,430.7) | -2.33 (-2.57,-2.08) |
| Barbados | 0.1 (0,0.1) | 13.9 (6,23.4) | -2.07 (-2.49,-1.66) | 1.3 (0.6,2.3) | 254.8 (109.4,439.4) | -2.13 (-2.52,-1.74) |
| Belize | 0 (0,0.1) | 17.8 (8.8,28.1) | -2.78 (-3.14,-2.41) | 1.1 (0.5,1.7) | 360.7 (178.1,572.1) | -2.86 (-3.21,-2.51) |
| Bermuda | 0 (0,0) | 3.2 (0.6,6.3) | -6.17 (-6.61,-5.72) | 0.1 (0,0.2) | 60.2 (11.3,117.7) | -6.17 (-6.63,-5.72) |
| Cuba | 4.4 (2.2,7.1) | 21 (10.5,34.1) | -2.64 (-2.98,-2.3) | 79.9 (39.6,130.5) | 403.6 (199.4,659.4) | -2.5 (-2.84,-2.16) |
| Dominica | 0 (0,0) | 19.2 (8.7,31.6) | -2.99 (-3.47,-2.5) | 0.3 (0.1,0.5) | 360.1 (164.3,595.9) | -2.82 (-3.32,-2.32) |
| Dominican Republic | 2.7 (1,4.8) | 28.2 (10.6,49.4) | -1.07 (-1.38,-0.76) | 60.4 (22.6,107) | 598.6 (223.5,1055.2) | -0.91 (-1.24,-0.58) |
| Grenada | 0 (0,0) | 21.8 (9.1,37.5) | -2.38 (-2.73,-2.03) | 0.5 (0.2,0.9) | 439.4 (181.9,765.7) | -2.51 (-2.92,-2.1) |
| Guyana | 0.2 (0.1,0.3) | 36.1 (16.8,58.6) | -1.67 (-1.89,-1.45) | 5 (2.3,8.1) | 772 (359,1257.6) | -1.73 (-1.9,-1.55) |
| Haiti | 5.5 (3.8,7.6) | 94.5 (67.3,130.5) | -0.62 (-0.7,-0.54) | 139.9 (96.8,198.4) | 1959 (1375.5,2734.2) | -0.68 (-0.77,-0.59) |
| Jamaica | 0.3 (0.2,0.5) | 10.4 (5.5,16.2) | -1.85 (-2.62,-1.08) | 6.6 (3.5,10.4) | 207.9 (108.5,328.7) | -1.71 (-2.43,-0.98) |
| Puerto Rico | 0.2 (0,0.3) | 2.1 (0.5,4) | -4.29 (-4.81,-3.77) | 3.1 (0.8,5.9) | 44.3 (11.2,84.3) | -3.96 (-4.49,-3.42) |
| Saint Kitts and Nevis | 0 (0,0) | 5.2 (1.9,9.2) | -4.37 (-4.86,-3.87) | 0.1 (0,0.1) | 98.5 (35.5,176) | -4.64 (-5.18,-4.09) |
| Saint Lucia | 0 (0,0) | 10.9 (4.6,18.3) | -4.87 (-5.41,-4.32) | 0.5 (0.2,0.8) | 205.8 (88.2,348.9) | -4.44 (-4.94,-3.95) |
| Saint Vincent and the Grenadines | 0 (0,0) | 22.7 (8.8,38.6) | -2.64 (-2.98,-2.3) | 0.6 (0.2,0.9) | 408.5 (159.8,698.3) | -2.8 (-3.12,-2.47) |
| Suriname | 0.2 (0.1,0.3) | 24.8 (11.6,41.1) | -2.58 (-2.97,-2.19) | 3.5 (1.6,5.8) | 553.7 (256,910.5) | -2.55 (-2.95,-2.15) |
| Trinidad and Tobago | 0.5 (0.2,0.8) | 24.4 (9,44.3) | -2.78 (-3.1,-2.46) | 9.9 (3.6,18.3) | 521.6 (190,957.8) | -2.65 (-3,-2.3) |
| Armenia | 2.7 (1.8,3.6) | 61.9 (41.7,83.5) | -1.79 (-2.05,-1.54) | 47.7 (32.2,64.3) | 1114.4 (752.5,1501.6) | -1.77 (-1.99,-1.54) |
| Azerbaijan | 5.2 (2.8,8) | 66.8 (35.6,103.2) | -1.58 (-1.85,-1.3) | 109.3 (56.3,168.3) | 1194.7 (625.9,1835.6) | -2.12 (-2.43,-1.82) |
| Georgia | 1.7 (1,2.4) | 26.8 (16.4,37.9) | -4.87 (-5.62,-4.12) | 32.3 (19.8,45.6) | 550.6 (338.1,779.3) | -4.9 (-5.72,-4.06) |
| Kazakhstan | 6.6 (4.4,9.1) | 48.5 (31.9,66.3) | -2.32 (-2.9,-1.74) | 129 (84.4,177) | 815 (535.2,1116.7) | -2.9 (-3.55,-2.24) |
| Kyrgyzstan | 3.1 (2.2,4.1) | 85.7 (60.9,112) | 0.15 (-0.3,0.6) | 64 (45.8,84.7) | 1491.3 (1062.3,1957.2) | -0.42 (-0.91,0.06) |
| Mongolia | 1.1 (0.8,1.6) | 71.1 (48,96.7) | -2.51 (-2.85,-2.17) | 25.9 (17.5,35.8) | 1254 (851.4,1702.9) | -2.67 (-3.05,-2.29) |
| Tajikistan | 3.7 (2.7,4.9) | 90.8 (66.8,117.2) | -1.34 (-1.67,-1.01) | 83 (60.3,108.6) | 1626.7 (1196.6,2117.4) | -1.66 (-1.97,-1.35) |
| Turkmenistan | 2.2 (1.2,3.4) | 67.7 (37.5,105.2) | -1.05 (-1.36,-0.74) | 47.8 (26.2,73.8) | 1278.2 (703.5,1974) | -1.11 (-1.45,-0.77) |
| Uzbekistan | 21.2 (14.8,27.6) | 106.8 (74.7,140.2) | 0.21 (-0.16,0.58) | 460.7 (317.9,605.6) | 1947 (1350.6,2531.4) | -0.04 (-0.41,0.34) |
| Albania | 1.3 (0.8,1.9) | 31.3 (19.3,46.9) | -2.43 (-2.72,-2.14) | 21.1 (12.9,32) | 502.3 (308,759.6) | -2.85 (-3.16,-2.55) |
| Bosnia and Herzegovina | 2.6 (1.8,3.6) | 41.4 (28.2,57.3) | -2.77 (-2.98,-2.55) | 45.5 (31,62.8) | 729.6 (496.3,1009.8) | -3.13 (-3.31,-2.94) |
| Bulgaria | 5.3 (3.8,7.5) | 37.7 (26.9,53.5) | -4.18 (-4.59,-3.77) | 94.6 (66.3,134.2) | 706.2 (494,1002) | -3.85 (-4.25,-3.44) |
| Croatia | 2 (1.4,2.7) | 20.7 (14.5,27.6) | -3.92 (-4.13,-3.71) | 30.7 (21.4,40.8) | 333.2 (232.4,443) | -4.08 (-4.31,-3.85) |
| Hungary | 5 (3.4,7.2) | 23.2 (16.1,33.7) | -3.5 (-3.82,-3.18) | 82.3 (57.1,120.8) | 414.6 (287,611.6) | -3.97 (-4.26,-3.68) |
| Montenegro | 0.4 (0.2,0.6) | 45 (28.8,71.1) | -0.63 (-0.84,-0.42) | 6.8 (4.4,10.8) | 745.4 (484.1,1181.5) | -1.29 (-1.55,-1.03) |
| Poland | 16.9 (12.1,22.2) | 21.6 (15.5,28.5) | -4.68 (-4.86,-4.5) | 278.5 (200.2,365.4) | 379.5 (272.6,498.6) | -5.12 (-5.29,-4.94) |
| Romania | 9.6 (6.4,13.6) | 23.7 (15.9,33.5) | -4.63 (-4.95,-4.31) | 162.1 (108.3,228.8) | 434 (289.6,614) | -4.62 (-4.98,-4.26) |
| Serbia | 7.3 (5,9.9) | 42.4 (29.3,57.3) | -3.92 (-4.3,-3.55) | 119.5 (83.4,162.1) | 716.8 (502.7,969.9) | -3.8 (-4.18,-3.41) |
| Slovakia | 2.7 (1.9,3.7) | 29 (20.5,38.7) | -3.1 (-3.37,-2.84) | 45.7 (32.5,61.6) | 483 (342.7,650.1) | -3.65 (-3.92,-3.38) |
| Slovenia | 0.3 (0.2,0.5) | 6.3 (4.2,8.6) | -5.58 (-5.81,-5.34) | 5.3 (3.6,7.2) | 112.3 (76.1,153.5) | -5.77 (-6,-5.54) |
| Colombia | 6.9 (4.3,10) | 12.2 (7.6,17.7) | -4.44 (-4.55,-4.34) | 128 (79.1,185.3) | 229.7 (141.9,332.6) | -4.69 (-4.8,-4.59) |
| Costa Rica | 0.4 (0.3,0.6) | 7.5 (4.7,10.7) | -4.59 (-4.87,-4.31) | 8.6 (5.4,12.2) | 155.8 (97.5,220.4) | -4.38 (-4.64,-4.12) |
| El Salvador | 1.4 (0.8,2) | 20.8 (12.4,29.9) | -2.77 (-2.95,-2.6) | 26.4 (15.8,38.8) | 416.5 (249.3,613.4) | -2.9 (-3.08,-2.73) |
| Guatemala | 3 (2,3.9) | 32.9 (21.7,42.9) | -2.02 (-2.39,-1.66) | 60.2 (40,80.4) | 576.6 (384.4,765) | -2.33 (-2.76,-1.9) |
| Honduras | 2.9 (2,3.8) | 57 (40,75.8) | 0.81 (0.52,1.11) | 61.5 (42.6,82.7) | 1041.7 (728.5,1378.2) | 0.56 (0.32,0.79) |
| Mexico | 20.4 (12.8,29.4) | 17.9 (11.3,25.9) | -2.33 (-2.57,-2.08) | 407.5 (255.3,585.5) | 330.9 (207.5,476.1) | -2.29 (-2.52,-2.07) |
| Nicaragua | 1.1 (0.8,1.4) | 25.5 (18.3,33.8) | -0.89 (-1.2,-0.58) | 22.2 (15.8,29.7) | 471.6 (336.8,629.2) | -1.14 (-1.41,-0.87) |
| Panama | 0.3 (0.2,0.5) | 6.3 (3.3,10.5) | -4.82 (-5.02,-4.61) | 5.6 (2.9,9.3) | 125 (65.5,206.8) | -4.66 (-4.87,-4.45) |
| Angola | 3.5 (2.3,5) | 40.7 (26.6,56.7) | -1.38 (-1.5,-1.26) | 91.4 (58.4,129.7) | 815.2 (524.3,1147) | -1.59 (-1.71,-1.47) |
| Central African Republic | 1.2 (0.8,1.7) | 69.5 (46.8,97.9) | -0.43 (-0.5,-0.35) | 33.5 (21.5,48.9) | 1500.5 (1007.3,2138.3) | -0.49 (-0.58,-0.4) |
| Congo | 1.2 (0.8,1.6) | 59.7 (41.6,79) | -1.43 (-1.58,-1.28) | 31.5 (21.4,43.6) | 1200.9 (829,1600.2) | -1.66 (-1.82,-1.5) |
| Democratic Republic of the Congo | 14.2 (9.6,19.5) | 50.7 (34.9,71.2) | -0.71 (-0.8,-0.62) | 361.9 (247.6,503.5) | 1030.6 (709,1419.6) | -0.74 (-0.82,-0.65) |
| Equatorial Guinea | 0.2 (0.1,0.3) | 40.5 (21.3,64.7) | -2.33 (-2.87,-1.8) | 3.8 (1.9,6.3) | 782.3 (403.3,1268.5) | -2.75 (-3.32,-2.17) |
| Gabon | 0.3 (0.2,0.4) | 33.4 (19,51.2) | -0.56 (-0.71,-0.42) | 6.4 (3.5,10.2) | 650.7 (362.5,1016.3) | -0.69 (-0.83,-0.54) |
| China | 681.9 (493.9,883.6) | 38.6 (28,49.6) | 0.24 (-0.2,0.67) | 12382.4 (8855.4,16200.9) | 640.4 (460.3,834.1) | -0.22 (-0.59,0.16) |
| Taiwan (Province of China) | 2.5 (1.8,3.3) | 5.8 (4.1,7.5) | -3.28 (-3.59,-2.97) | 48.8 (35.3,63.1) | 116.7 (84.6,150.8) | -2.85 (-3.17,-2.54) |
| Belarus | 8.6 (5.7,12.1) | 52.5 (35.1,73.8) | -2.57 (-3,-2.14) | 153.7 (102.3,216.3) | 959.6 (639.3,1350.1) | -2.68 (-3.19,-2.17) |
| Estonia | 0.1 (0,0.3) | 4.2 (1.3,8.3) | -9.73 (-10.39,-9.07) | 2 (0.6,4) | 70.2 (21.2,138.4) | -9.99 (-10.65,-9.33) |
| Latvia | 0.9 (0.6,1.3) | 19.7 (12.1,28.9) | -5.88 (-6.36,-5.39) | 14.6 (9.1,21.5) | 357.2 (223,526) | -6.18 (-6.71,-5.64) |
| Lithuania | 1.2 (0.7,1.8) | 17.8 (10.5,26.2) | -5.36 (-5.69,-5.04) | 18.3 (10.7,27) | 300.7 (175.9,443.2) | -5.58 (-5.95,-5.22) |
| Russian Federation | 54.7 (31.4,86.7) | 22.7 (13.1,36) | -4.46 (-5.04,-3.88) | 1026.3 (590.2,1620) | 434.2 (249.5,685.3) | -4.58 (-5.23,-3.93) |
| Ukraine | 47.9 (26.3,77.3) | 60.1 (33,97.1) | -2.53 (-3.17,-1.89) | 818.9 (443,1288.7) | 1047 (563.7,1642.8) | -2.53 (-3.18,-1.88) |
| Burundi | 1.6 (1.1,2) | 39.3 (27.9,50.6) | -1.19 (-1.38,-1) | 41.8 (28.8,55.3) | 835.5 (581.5,1087.7) | -1.37 (-1.57,-1.16) |
| Comoros | 0.1 (0.1,0.2) | 30.1 (20.6,41) | -0.79 (-0.95,-0.63) | 3 (2,4.1) | 621.7 (422.1,840.6) | -0.98 (-1.17,-0.79) |
| Djibouti | 0.2 (0.1,0.2) | 32.4 (20.1,47.7) | 0.5 (0.39,0.62) | 4.4 (2.7,6.6) | 677 (422.4,1006.4) | 0.41 (0.29,0.54) |
| Eritrea | 0.8 (0.6,1.2) | 38.4 (27.2,52.1) | 0.14 (0.06,0.21) | 24 (16.2,34) | 826.7 (572.7,1142.9) | -0.09 (-0.16,-0.02) |
| Ethiopia | 9.2 (7,12.1) | 24.9 (18.5,32.4) | -1.57 (-1.67,-1.47) | 229.5 (171.1,299.6) | 519.7 (390.6,675.4) | -1.97 (-2.1,-1.85) |
| Kenya | 4.6 (3.1,6.2) | 26.3 (18,35.3) | 1.62 (1.35,1.9) | 113.6 (78,151.7) | 520.4 (356.8,699.8) | 1.5 (1.16,1.84) |
| Madagascar | 4.1 (2.8,5.7) | 45.9 (31.9,62.2) | 0.27 (0.12,0.41) | 119.9 (82.3,164.6) | 1002.7 (693.1,1375.8) | 0.17 (0.03,0.31) |
| Malawi | 2.4 (1.8,3.2) | 38.5 (28.8,49.9) | 0.39 (0.13,0.65) | 65.4 (47.9,86.4) | 846.8 (621.3,1097.4) | 0.37 (0.07,0.67) |
| Mozambique | 2 (1.3,2.6) | 22.3 (15.2,29.5) | 1.53 (1.35,1.71) | 53.8 (36.1,72.4) | 480 (329.3,631.5) | 1.68 (1.46,1.89) |
| Rwanda | 1.5 (0.9,2) | 30 (19.6,42.3) | -2.23 (-2.59,-1.87) | 36.3 (23.5,50.2) | 597 (388.2,831.6) | -2.69 (-3.09,-2.28) |
| Somalia | 1.5 (1,2.3) | 31.3 (20.6,45.1) | 0.17 (0.03,0.3) | 45.6 (28.5,69.5) | 700.9 (456.9,1027.1) | 0.06 (-0.07,0.19) |
| South Sudan | 1.2 (0.8,1.7) | 37.4 (25.3,53) | 0.31 (0.23,0.39) | 32.1 (21.1,47.1) | 812.5 (545.1,1159.4) | 0.26 (0.15,0.38) |
| Uganda | 3.9 (2.8,5.3) | 32.6 (23.5,44.2) | -0.62 (-1,-0.24) | 100.6 (69.3,135) | 676.8 (475.5,913.6) | -0.73 (-1.13,-0.32) |
| Zambia | 2.2 (1.6,3) | 40.2 (28.9,53.7) | 1.28 (1.17,1.38) | 58.3 (40.4,79.9) | 833.4 (587.9,1120.5) | 1.11 (0.99,1.24) |
| Japan | 14.9 (7.8,23.7) | 3.1 (1.6,4.8) | -3.17 (-3.54,-2.8) | 219.2 (115.7,340.2) | 61 (31.7,94.5) | -2.72 (-3.02,-2.42) |
| Singapore | 0.7 (0.4,1) | 7.8 (4.3,12) | -5.4 (-5.79,-5) | 13.3 (7.2,20.2) | 155.2 (83.9,237) | -5.54 (-5.95,-5.14) |
| Canada | 1.4 (0.5,2.6) | 1.7 (0.6,3.2) | -7.17 (-7.57,-6.76) | 23 (8.2,42.7) | 31.4 (11.2,58.2) | -7.17 (-7.54,-6.81) |
| Greenland | 0 (0,0) | 3.1 (0.1,8.7) | -4.7 (-5.19,-4.21) | 0 (0,0.1) | 61.9 (2.3,175.8) | -4.72 (-5.18,-4.25) |
| Afghanistan | 10.3 (7.3,14.1) | 123.2 (88.2,163.1) | -1.08 (-1.19,-0.97) | 292.2 (201.8,408.4) | 2701.1 (1908.7,3613.6) | -1.3 (-1.43,-1.18) |
| Algeria | 12.3 (8,17.4) | 49.2 (32,68.9) | -1.27 (-1.47,-1.07) | 249.2 (158.4,360.2) | 796.5 (520.8,1132.1) | -1.73 (-1.98,-1.49) |
| Bahrain | 0.3 (0.3,0.4) | 65.5 (50.1,82.3) | -3.61 (-4.01,-3.22) | 9.2 (6.8,11.8) | 1126.5 (864.9,1427) | -4.04 (-4.4,-3.68) |
| Egypt | 65.8 (49.4,85) | 142.6 (106.4,181.2) | 0.29 (0.03,0.56) | 1691.7 (1246.3,2202.7) | 2803.6 (2106,3616.1) | 0.17 (-0.07,0.41) |
| Iraq | 15.1 (10.2,20.5) | 81.7 (56.2,110) | -0.53 (-0.68,-0.38) | 356.1 (238.2,487) | 1567.5 (1064.6,2118.6) | -0.93 (-1.07,-0.79) |
| Jordan | 1.6 (1.1,2.2) | 28.2 (19.7,37.9) | -2.09 (-2.42,-1.76) | 41.3 (28.3,55.6) | 555.9 (385.6,747.5) | -2.35 (-2.68,-2.02) |
| Kuwait | 1.1 (0.8,1.5) | 42 (29.9,56.4) | -1.72 (-2.19,-1.24) | 30.5 (21.9,40.8) | 877.7 (622.9,1165.1) | -1.78 (-2.25,-1.29) |
| Lebanon | 1.2 (0.8,1.8) | 18.7 (11.8,27.1) | -2.64 (-2.97,-2.3) | 21.8 (13.6,31.6) | 350.6 (219.9,508.6) | -2.93 (-3.32,-2.54) |
| Libya | 2.5 (1.7,3.5) | 54.7 (37.3,76.3) | 1.06 (0.62,1.49) | 62.6 (42.1,88.6) | 1140.9 (773.5,1609.8) | 0.9 (0.5,1.31) |
| Morocco | 16.7 (10.9,23.1) | 56.8 (37.3,78.2) | -0.88 (-1.08,-0.68) | 367 (238.2,518.9) | 1102.3 (721.1,1545.3) | -1.2 (-1.41,-0.99) |
| Oman | 0.9 (0.6,1.2) | 63 (44,82.6) | -1.39 (-1.54,-1.23) | 23.6 (16.1,31.5) | 1187.8 (824.3,1555.8) | -1.87 (-2.08,-1.66) |
| Palestine | 1 (0.6,1.3) | 52.1 (34.1,70.2) | -1.31 (-1.63,-0.99) | 22.6 (14.7,30.5) | 950.6 (614.9,1283.1) | -1.46 (-1.74,-1.17) |
| Qatar | 0.3 (0.2,0.4) | 53.6 (37.7,70.9) | -4.51 (-5.27,-3.75) | 8.9 (6.1,12.3) | 927.1 (652.9,1225.3) | -4.51 (-5.19,-3.83) |
| Saudi Arabia | 12.7 (9,16.8) | 73.1 (53.9,94.3) | -0.31 (-0.57,-0.04) | 420 (291.4,566.4) | 1651.8 (1191.2,2150.6) | -0.01 (-0.3,0.28) |
| Sudan | 17.4 (12.4,24.3) | 104.5 (75.3,143.5) | -1.39 (-1.46,-1.33) | 438.2 (304.8,624.5) | 2164.1 (1538.6,3034.1) | -1.61 (-1.69,-1.54) |
| Tunisia | 4.5 (2.7,6.6) | 37.8 (23.3,55.4) | -1.36 (-1.61,-1.11) | 89.5 (54.4,133) | 698.2 (426.1,1031.5) | -1.47 (-1.72,-1.22) |
| Turkey | 26 (18.3,34.3) | 30.9 (21.8,40.7) | -1.38 (-1.75,-1.01) | 505.3 (351,663) | 558.6 (389.7,735.2) | -2.01 (-2.31,-1.71) |
| United Arab Emirates | 1 (0.7,1.3) | 57.6 (41.3,75) | 0.09 (-0.5,0.69) | 31.9 (21.7,42.9) | 999 (713.2,1301.3) | -0.89 (-1.39,-0.4) |
| Yemen | 11.2 (7.4,16) | 96.8 (64.3,137.4) | -1.27 (-1.37,-1.16) | 285.4 (188.6,413.9) | 1993.8 (1329.6,2848.9) | -1.53 (-1.63,-1.43) |
| American Samoa | 0 (0,0) | 10.5 (1,23.8) | 0.47 (0.28,0.66) | 0.1 (0,0.3) | 235.7 (22.8,535) | 0.44 (0.25,0.63) |
| Cook Islands | 0 (0,0) | 4.2 (0,10.1) | -3.19 (-3.67,-2.71) | 0 (0,0.1) | 91.9 (0,219.7) | -3.15 (-3.65,-2.64) |
| Fiji | 0.3 (0.1,0.6) | 52.4 (17.8,91.2) | -2.13 (-2.34,-1.92) | 9 (3,16.1) | 1158.3 (384.2,2041.7) | -2.29 (-2.46,-2.12) |
| Guam | 0 (0,0) | 10.7 (5,16.7) | -0.01 (-0.78,0.76) | 0.6 (0.3,0.9) | 287.7 (133.1,449) | 0.85 (0.15,1.55) |
| Kiribati | 0 (0,0.1) | 61.8 (42.9,85.9) | -1.02 (-1.2,-0.83) | 1.2 (0.8,1.7) | 1506.5 (1021.9,2132.6) | -1.09 (-1.27,-0.92) |
| Marshall Islands | 0 (0,0) | 63.9 (38.2,98.3) | 0.01 (-0.18,0.19) | 0.6 (0.3,0.9) | 1503.5 (890.2,2351.1) | 0.03 (-0.16,0.22) |
| Northern Mariana Islands | 0 (0,0) | 13.1 (6,20.6) | 0.97 (0.38,1.57) | 0.2 (0.1,0.2) | 286.7 (133.9,451) | 0.93 (0.32,1.54) |
| Papua New Guinea | 2.8 (1.9,3.8) | 63.1 (42.8,86.4) | 0.16 (0.05,0.28) | 83.3 (55.4,117) | 1464.8 (990,2028.5) | 0.04 (-0.06,0.15) |
| Samoa | 0.1 (0.1,0.1) | 77.5 (51.4,105.1) | -0.15 (-0.25,-0.06) | 2.5 (1.6,3.5) | 1695.2 (1114.8,2343.1) | -0.1 (-0.19,-0.01) |
| Solomon Islands | 0.4 (0.3,0.5) | 121.5 (87.9,158.7) | -0.31 (-0.42,-0.19) | 10.2 (7.2,14.1) | 2739.4 (1956.3,3674.4) | -0.31 (-0.45,-0.17) |
| Tokelau | 0 (0,0) | 7.6 (0.1,19.6) | -1.67 (-1.98,-1.36) | 0 (0,0) | 164.7 (1.2,418.1) | -1.7 (-2.02,-1.39) |
| Tonga | 0 (0,0) | 36.9 (21.9,54.3) | -1.04 (-1.18,-0.9) | 0.7 (0.4,1) | 807.9 (471.9,1235.2) | -1.13 (-1.26,-1) |
| Tuvalu | 0 (0,0) | 24.2 (12.8,41) | -4.5 (-4.66,-4.34) | 0.1 (0,0.1) | 554 (293.5,940.3) | -4.53 (-4.69,-4.37) |
| Vanuatu | 0.2 (0.1,0.2) | 132.6 (99.3,165.2) | -0.24 (-0.28,-0.19) | 5.8 (4.2,7.4) | 3078.1 (2274,3906.6) | -0.28 (-0.35,-0.22) |
| Bangladesh | 59.8 (42.7,77.5) | 47.7 (34.3,61.4) | -0.3 (-0.43,-0.17) | 1449.8 (1018.8,1892.4) | 1043.3 (742.1,1353.4) | -0.65 (-0.74,-0.57) |
| Bhutan | 0.2 (0.1,0.3) | 34 (23.1,45.5) | -1.12 (-1.29,-0.95) | 4.3 (2.8,5.9) | 699 (468.2,958.3) | -1.57 (-1.74,-1.4) |
| India | 647.4 (495.3,797.4) | 59.9 (46,73.5) | 0.13 (-0.06,0.32) | 16311.1 (12527.8,20039.2) | 1344.5 (1033.2,1653.1) | -0.15 (-0.28,-0.01) |
| Nepal | 12.2 (8.7,16.1) | 60.3 (43.5,79.2) | 0.39 (0.21,0.56) | 291.9 (207.2,387.5) | 1266.3 (900.1,1675.4) | 0.05 (-0.13,0.23) |
| Pakistan | 80.8 (59.3,104.2) | 77 (56.2,98.4) | 0.59 (0.43,0.76) | 2190.8 (1592.9,2834.9) | 1690.9 (1237.6,2174.9) | 0.49 (0.31,0.67) |
| Cambodia | 4.6 (3.3,6.3) | 47.2 (33.6,62.2) | -0.46 (-0.52,-0.4) | 113.6 (77.9,158.1) | 946.6 (663.3,1283.2) | -0.87 (-0.93,-0.81) |
| Indonesia | 69.2 (47.3,96.6) | 35.9 (24.3,49.4) | -0.5 (-0.77,-0.23) | 1820 (1232.1,2540.4) | 755.9 (518.2,1049.1) | -0.81 (-1.07,-0.55) |
| Malaysia | 6.7 (4.4,9.4) | 26.4 (17.3,37.1) | -2.28 (-2.51,-2.04) | 158.1 (105.1,224.1) | 558.1 (371.6,787.2) | -2.3 (-2.52,-2.09) |
| Maldives | 0 (0,0) | 10.1 (5.4,16.1) | -7.37 (-7.75,-6.98) | 0.7 (0.4,1.1) | 185.8 (99.3,295.7) | -8.05 (-8.47,-7.63) |
| Mauritius | 0.1 (0,0.2) | 7.5 (2.5,13.2) | -4.1 (-4.55,-3.65) | 2.8 (0.9,4.9) | 158.1 (52.2,281.4) | -4.1 (-4.53,-3.66) |
| Myanmar | 24.1 (17.4,32.4) | 59 (42.7,78.9) | -1.47 (-1.59,-1.35) | 551.3 (395.1,739.4) | 1169.9 (838.1,1563.4) | -1.86 (-2,-1.72) |
| Philippines | 34.6 (24.3,45.6) | 48.8 (34.4,64.1) | -1.24 (-1.35,-1.14) | 894 (619.6,1179.7) | 1060.1 (741.9,1397.8) | -1.09 (-1.2,-0.98) |
| Seychelles | 0 (0,0) | 6.8 (2.4,12.6) | -1.99 (-2.3,-1.69) | 0.2 (0.1,0.3) | 140.7 (48.6,260.9) | -2.3 (-2.62,-1.97) |
| Sri Lanka | 6.7 (3.6,11) | 27.1 (14.5,43.9) | -2.27 (-2.69,-1.84) | 146.2 (77,244.3) | 554.9 (294,923.1) | -2.44 (-2.88,-1.99) |
| Thailand | 14.6 (9.9,20) | 13.6 (9.2,18.5) | -3.91 (-4.28,-3.53) | 311 (213.8,427.7) | 296.6 (204.3,407.2) | -3.59 (-3.97,-3.21) |
| Timor-Leste | 0.4 (0.3,0.6) | 62 (39.6,84.8) | 0.38 (0.26,0.51) | 10.2 (6.4,14.2) | 1235.4 (779.6,1716.7) | 0.17 (0.02,0.33) |
| Uruguay | 0.3 (0.1,0.6) | 5.5 (2.1,9.5) | -4.88 (-5.17,-4.58) | 6 (2.3,10.3) | 108.2 (42,186.4) | -4.82 (-5.12,-4.52) |
| Argentina | 4.9 (2.5,7.8) | 8.5 (4.3,13.5) | -4.08 (-4.36,-3.79) | 91.8 (47.1,145.6) | 164 (84.2,259.9) | -4.13 (-4.4,-3.86) |
| Chile | 2.3 (1.5,3.2) | 8.8 (5.7,12.1) | -4.52 (-4.71,-4.33) | 46.1 (30.3,63.4) | 180.7 (118.7,248.8) | -4.03 (-4.2,-3.85) |
| Botswana | 0.2 (0.1,0.3) | 17.5 (9.8,27.3) | -2.56 (-2.85,-2.27) | 4.9 (2.8,7.9) | 348.4 (199.1,551.5) | -2.75 (-3.06,-2.44) |
| Lesotho | 0.3 (0.2,0.5) | 33.9 (21.5,52.6) | 2.61 (2.05,3.18) | 7.7 (4.6,12.6) | 724.7 (452.1,1166.7) | 2.82 (2.23,3.42) |
| Namibia | 0.3 (0.2,0.5) | 29.2 (15.9,45.2) | -1.4 (-1.79,-1.01) | 7.8 (4.2,12.3) | 587.3 (320.2,913.6) | -1.52 (-1.94,-1.09) |
| South Africa | 6.9 (4.8,9.2) | 17.7 (12.4,23.4) | -0.84 (-1.29,-0.38) | 162.8 (114.5,218.6) | 357.5 (250,476.6) | -1.1 (-1.54,-0.66) |
| Zimbabwe | 2.5 (1.8,3.3) | 47.4 (34.5,63.4) | 1.67 (1.15,2.2) | 63.2 (44.9,87.8) | 957.5 (695,1296.3) | 1.93 (1.36,2.51) |
| Brazil | 20.8 (11.6,31) | 8.4 (4.7,12.6) | -4.24 (-4.36,-4.13) | 487 (269.7,720.3) | 192.4 (106.4,284.6) | -4.08 (-4.22,-3.95) |
| Paraguay | 0.8 (0.3,1.4) | 14.6 (5.2,26.2) | -2.93 (-3.14,-2.72) | 17.4 (6.1,31.4) | 299.2 (105.5,539.2) | -2.98 (-3.23,-2.73) |
| Andorra | 0 (0,0) | 3 (1.5,4.9) | -4.63 (-4.98,-4.27) | 0.1 (0,0.1) | 52.4 (26.4,87.5) | -4.84 (-5.19,-4.49) |
| Austria | 1.6 (1,2.2) | 7.2 (4.7,9.7) | -5.63 (-5.93,-5.33) | 23.3 (15.4,31.8) | 117.7 (77.9,159.6) | -6 (-6.26,-5.74) |
| Belgium | 1.1 (0.7,1.5) | 3.9 (2.5,5.3) | -6.54 (-6.91,-6.18) | 17.3 (11.1,23.6) | 71.1 (47.1,96.3) | -6.62 (-6.96,-6.28) |
| Cyprus | 0.2 (0.1,0.3) | 12.8 (8.6,17.5) | -5.05 (-5.27,-4.82) | 3.8 (2.6,5.3) | 205.4 (137.6,282.1) | -4.83 (-5.07,-4.58) |
| Denmark | 0.4 (0.2,0.6) | 3.2 (1.9,4.8) | -8.46 (-8.73,-8.19) | 6.9 (4,10.2) | 57.2 (33,84.5) | -8.45 (-8.67,-8.22) |
| Finland | 0.3 (0,0.6) | 1.7 (0.2,3.7) | -7.56 (-8.09,-7.04) | 3.9 (0.5,8.5) | 28.5 (3.7,62.1) | -8.03 (-8.51,-7.54) |
| France | 4.7 (2.9,6.7) | 2.5 (1.5,3.5) | -5.91 (-6.25,-5.58) | 70.4 (43.8,100.9) | 46.4 (28.9,65.9) | -5.79 (-6.11,-5.48) |
| Germany | 14.2 (8.9,20.2) | 6 (3.8,8.5) | -6.25 (-6.48,-6.01) | 212.4 (135.5,297.9) | 103.3 (66.6,144.3) | -6.37 (-6.58,-6.17) |
| Greece | 3.1 (2.2,4) | 10.7 (7.5,13.9) | -3.93 (-4.46,-3.4) | 49.4 (34.9,64.5) | 211.3 (151.8,274.8) | -3.69 (-4.14,-3.23) |
| Iceland | 0 (0,0) | 1.3 (0.2,2.9) | -6.46 (-6.91,-6.01) | 0.1 (0,0.3) | 22.9 (4,50.3) | -6.75 (-7.14,-6.36) |
| Ireland | 0.3 (0.1,0.4) | 3 (1.5,4.8) | -7.63 (-7.95,-7.3) | 4.2 (2.1,6.7) | 52.6 (25.8,84.1) | -7.9 (-8.19,-7.6) |
| Israel | 0.9 (0.7,1.2) | 6.7 (4.7,8.7) | -6.42 (-6.62,-6.23) | 14.9 (10.7,19.2) | 115.9 (83.9,149.1) | -6.53 (-6.72,-6.35) |
| Italy | 11.8 (7.8,15.7) | 6.1 (4.1,8.1) | -5.05 (-5.34,-4.77) | 165.1 (111.8,218.4) | 102.6 (70.8,134.9) | -5.34 (-5.59,-5.09) |
| Luxembourg | 0 (0,0.1) | 3 (1.6,4.5) | -6.84 (-7.18,-6.5) | 0.6 (0.3,0.9) | 51.3 (27.6,78) | -7.11 (-7.44,-6.79) |
| Malta | 0.1 (0.1,0.1) | 8.5 (5.5,11.5) | -4.82 (-5.23,-4.4) | 1.5 (1,2) | 150.9 (101.6,204.1) | -4.92 (-5.3,-4.54) |
| Netherlands | 1.5 (1,2.1) | 3.9 (2.5,5.3) | -7.21 (-7.44,-6.97) | 23.9 (15.7,32.5) | 65.7 (43.3,89.4) | -7.63 (-7.89,-7.37) |
| Norway | 0.2 (0.1,0.3) | 1.4 (0.5,2.5) | -8.93 (-9.32,-8.54) | 2.5 (0.9,4.6) | 23.8 (8.4,43.2) | -9.22 (-9.55,-8.9) |
| Portugal | 0.6 (0.3,1) | 2.2 (1.1,3.4) | -6.91 (-7.38,-6.44) | 10.3 (5.3,16.1) | 42.1 (21.6,65.7) | -6.65 (-7.09,-6.21) |
| Spain | 3.3 (2,4.9) | 2.7 (1.6,4) | -5.78 (-6.17,-5.38) | 52.9 (32.2,77.4) | 52.4 (31.9,76.1) | -5.7 (-6.08,-5.33) |
| Sweden | 0.4 (0.1,0.9) | 1.6 (0.5,3.2) | -8.01 (-8.44,-7.58) | 6.4 (1.8,12.6) | 27.1 (7.7,52.7) | -8.15 (-8.53,-7.76) |
| Switzerland | 0.7 (0.4,1.1) | 3.1 (1.9,4.6) | -6.97 (-7.23,-6.7) | 10.3 (6.1,14.9) | 50.2 (30.4,72.3) | -7.28 (-7.52,-7.04) |
| United Kingdom | 6.3 (3.7,9.1) | 4.3 (2.5,6.2) | -7.45 (-7.73,-7.17) | 104.2 (62.6,151.1) | 80.5 (48.5,116.2) | -7.54 (-7.8,-7.28) |
| Benin | 1.5 (1.1,1.9) | 35.5 (26.4,45.3) | 0.22 (0.05,0.39) | 34 (24.6,44.4) | 689.4 (507.8,890.9) | 0.1 (-0.09,0.28) |
| Burkina Faso | 3.3 (2.3,4.5) | 44.6 (31.6,59.8) | 0.72 (0.58,0.86) | 74.5 (51.2,101.1) | 859.3 (598.3,1149.9) | 0.55 (0.44,0.67) |
| Cameroon | 4.3 (3,6.2) | 44.5 (32,63.5) | 0.86 (0.32,1.41) | 105.5 (71.9,154.2) | 876.7 (616.2,1258.5) | 0.83 (0.25,1.42) |
| Chad | 2.2 (1.6,3) | 47.9 (33.9,64.7) | 0.46 (0.24,0.67) | 54.2 (38.1,74.5) | 972.2 (689.3,1318.6) | 0.45 (0.22,0.69) |
| Ghana | 5.6 (4,7.4) | 42.9 (30.2,55.8) | -1.89 (-2.22,-1.56) | 138.4 (96.7,181.3) | 854.4 (602.5,1117.9) | -1.97 (-2.3,-1.64) |
| Guinea | 2.4 (1.7,3.3) | 50.8 (36.6,68.4) | 0.83 (0.7,0.97) | 55.1 (38.5,76.6) | 1010.9 (712.5,1393.3) | 0.81 (0.66,0.95) |
| Guinea-Bissau | 0.4 (0.3,0.5) | 72.1 (51.3,96.4) | 0.2 (0.11,0.28) | 10.7 (7.4,14.5) | 1495 (1048.5,2021.3) | 0.03 (-0.07,0.13) |
| Liberia | 0.9 (0.6,1.2) | 52.3 (37.6,70.4) | 0.16 (0.03,0.29) | 21.2 (14.7,29.2) | 1030.5 (729.4,1404) | 0.13 (0,0.26) |
| Mali | 2.3 (1.6,3.1) | 33 (23.5,44.2) | -0.04 (-0.14,0.06) | 55.5 (38.4,75.5) | 659.7 (467.9,888.3) | -0.12 (-0.23,-0.02) |
| Mauritania | 0.9 (0.6,1.2) | 49.4 (33.7,66.8) | -1.07 (-1.27,-0.87) | 19.1 (12.7,26.4) | 932 (625.6,1276.6) | -1.28 (-1.47,-1.08) |
| Niger | 2.1 (1.3,3.1) | 33.5 (22.4,48.4) | 0.23 (0.14,0.33) | 49.4 (31.6,73.2) | 650.8 (425.4,955) | 0.15 (0.04,0.25) |
| Nigeria | 32 (23.3,41.6) | 45.9 (33.4,58.9) | -0.13 (-0.28,0.01) | 726.3 (513.6,953.8) | 853.1 (615.9,1106.2) | -0.28 (-0.43,-0.13) |
| Sao Tome and Principe | 0 (0,0) | 34.8 (25.1,46.3) | -0.02 (-0.26,0.21) | 0.7 (0.5,1) | 669.4 (494.7,904.4) | -0.17 (-0.45,0.12) |
| Senegal | 3.4 (2.5,4.6) | 54.4 (38.8,73.1) | -0.42 (-0.5,-0.34) | 76.8 (54.3,104) | 1045.2 (745.1,1406.1) | -0.55 (-0.63,-0.47) |
| Sierra Leone | 1.9 (1.3,2.5) | 59.6 (42.9,77.1) | 0.21 (0.02,0.41) | 43.8 (30.5,59.6) | 1188.6 (840.6,1586.4) | 0.25 (0.04,0.45) |
| Togo | 1.5 (1,2.1) | 53.2 (36.8,72) | -0.21 (-0.43,0) | 39 (26.1,55.3) | 1062.9 (726.1,1473.6) | -0.23 (-0.46,0) |
| North Korea | 16.1 (11.3,21) | 55.4 (38.7,72.2) | 0.26 (0.06,0.47) | 360.7 (252.8,478.4) | 1132.5 (796.1,1493.5) | 0.34 (0.14,0.54) |
| Laos | 2.8 (1.8,3.9) | 74.9 (50.3,100.2) | -1.31 (-1.37,-1.25) | 71.7 (47.2,99.8) | 1535.5 (1006.7,2105.3) | -1.69 (-1.75,-1.64) |
| Vietnam | 19.8 (13.8,26.1) | 23.7 (16.5,31.1) | -0.52 (-0.73,-0.31) | 424.4 (290.1,565.2) | 447.6 (310,588.3) | -0.63 (-0.84,-0.42) |
| Federated States of Micronesia | 0 (0,0.1) | 64.8 (38,101.6) | -1.38 (-1.44,-1.32) | 1.2 (0.7,1.9) | 1521.8 (871.4,2390.4) | -1.41 (-1.46,-1.36) |
| Czech Republic | 4.1 (2.9,5.4) | 17.6 (12.2,23.3) | -4.1 (-4.46,-3.74) | 64.3 (44.9,85.5) | 290.9 (202.8,387.5) | -4.7 (-5.01,-4.38) |
| Macedonia | 1.2 (0.9,1.7) | 52.5 (37.8,70.5) | -1.8 (-2.39,-1.2) | 24 (16.8,32.7) | 844.1 (595.9,1138.5) | -2.51 (-2.99,-2.02) |
| Moldova | 2.5 (1.5,3.7) | 41.9 (25.4,61.2) | -5.33 (-5.76,-4.89) | 47.2 (28.8,68.8) | 794.1 (483.8,1157.7) | -4.87 (-5.33,-4.41) |
| Brunei | 0 (0,0) | 4.9 (1,9.7) | -1.57 (-2.34,-0.79) | 0.4 (0.1,0.7) | 98.7 (20.9,196.6) | -1.81 (-2.6,-1.02) |
| South Korea | 6.3 (4,8.6) | 7 (4.4,9.5) | -2.97 (-3.26,-2.68) | 105.6 (67.8,142.6) | 116.7 (74.8,157.3) | -3.19 (-3.46,-2.92) |
| United States | 23.4 (11,38.7) | 3.8 (1.8,6.2) | -6.55 (-6.96,-6.14) | 417.7 (192.9,683.6) | 72.9 (33.5,119.8) | -6.45 (-6.83,-6.06) |
| The Bahamas | 0.1 (0,0.1) | 13.6 (5,25.8) | -1.87 (-2.14,-1.59) | 1.2 (0.4,2.3) | 289.7 (105.3,553.2) | -1.94 (-2.2,-1.68) |
| Bolivia | 1.8 (1.1,2.8) | 23.4 (14.4,37.3) | -3.31 (-3.38,-3.23) | 38 (23.1,60.8) | 438 (268.2,698.9) | -3.56 (-3.65,-3.46) |
| Venezuela | 5.9 (3.2,9.4) | 20.6 (11.1,33) | -2.2 (-2.35,-2.05) | 127.5 (67.9,207.5) | 426.4 (227.7,692) | -2.31 (-2.46,-2.16) |
| Iran | 29 (21.5,35.9) | 43.1 (32,53.4) | -2.07 (-2.19,-1.95) | 603.9 (451,749.7) | 799.4 (597.4,992.1) | -2.26 (-2.37,-2.15) |
| Syria | 8.9 (5.9,12.6) | 89.2 (60.1,124.1) | -0.32 (-0.5,-0.14) | 207.2 (135.6,295.9) | 1674.3 (1108.3,2352.3) | -0.71 (-0.9,-0.52) |
| Tanzania | 9.5 (6.8,12.9) | 43.8 (31.4,58.6) | 1.01 (0.9,1.13) | 239.2 (167.1,329.3) | 924.5 (656.7,1252.2) | 0.89 (0.77,1.02) |
| Swaziland | 0.2 (0.1,0.3) | 34.5 (18.7,54.7) | 0.15 (-0.41,0.72) | 4.3 (2.1,7.1) | 749 (395.5,1219.8) | 0.28 (-0.38,0.94) |
| Cape Verde | 0.2 (0.1,0.2) | 43.5 (29,59.1) | 0.39 (-0.16,0.95) | 113.3 (79.3,155.5) | 1049.4 (757.6,1414.9) | 0.09 (-0.42,0.6) |
| Cote d'Ivoire | 4.5 (3.2,6.1) | 52.9 (39.3,70.6) | -0.15 (-0.39,0.09) | 3.5 (2.3,4.6) | 795.9 (532.2,1071.9) | -0.26 (-0.51,0) |
| The Gambia | 0.5 (0.4,0.7) | 64.3 (44.5,85.5) | 0.59 (0.45,0.74) | 11.9 (8.1,16) | 1264.4 (860.6,1691.9) | 0.48 (0.31,0.65) |
| Principality of Monaco | 0 (0,0) | 4 (1.9,6.5) | -2.63 (-3.48,-1.78) | 0 (0,0) | 270.8 (25.9,596.7) | -2.74 (-3.58,-1.89) |
| Republic of Niue | 0 (0,0) | 12.7 (1.3,28.1) | -5.05 (-5.56,-4.54) | 0.1 (0,0.1) | 72.9 (35,118.9) | -5.15 (-5.67,-4.64) |
| Republic of Nauru | 0 (0,0) | 19.4 (2.7,44.5) | -1.01 (-2.25,0.25) | 0 (0,0.1) | 474.5 (63.8,1070.6) | -1.06 (-2.33,0.23) |
| Republic of Palau | 0 (0,0) | 12.7 (1.4,26.7) | 0.32 (-0.53,1.17) | 0.1 (0,0.1) | 282.3 (32.6,602.2) | 0.21 (-0.62,1.05) |
| Republic of San Marino | 0 (0,0) | 2.1 (1,3.7) | -5.04 (-5.59,-4.49) | 0 (0,0.1) | 39.6 (18.9,68.7) | -4.9 (-5.4,-4.39) |
| Virgin Islands, U.S. | 0 (0,0) | 5.9 (2.5,9.8) | -2.55 (-2.89,-2.2) | 0.2 (0.1,0.3) | 110.7 (47.4,185.9) | -2.56 (-2.93,-2.18) |

# Supplementary Figures


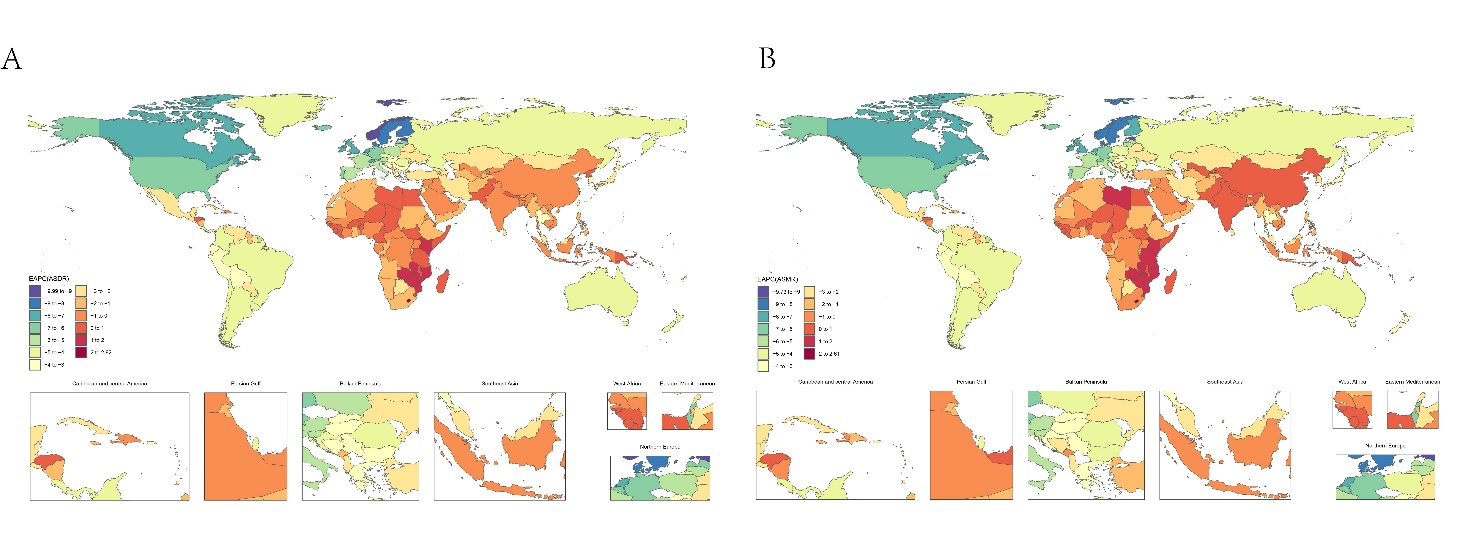


**Supplementary Figure 1.** Global trends and EAPC of Ischemic Heart Disease (IHD) across 204 countries or regions in 2021. EAPC, Estimated Annual Percentage Change.


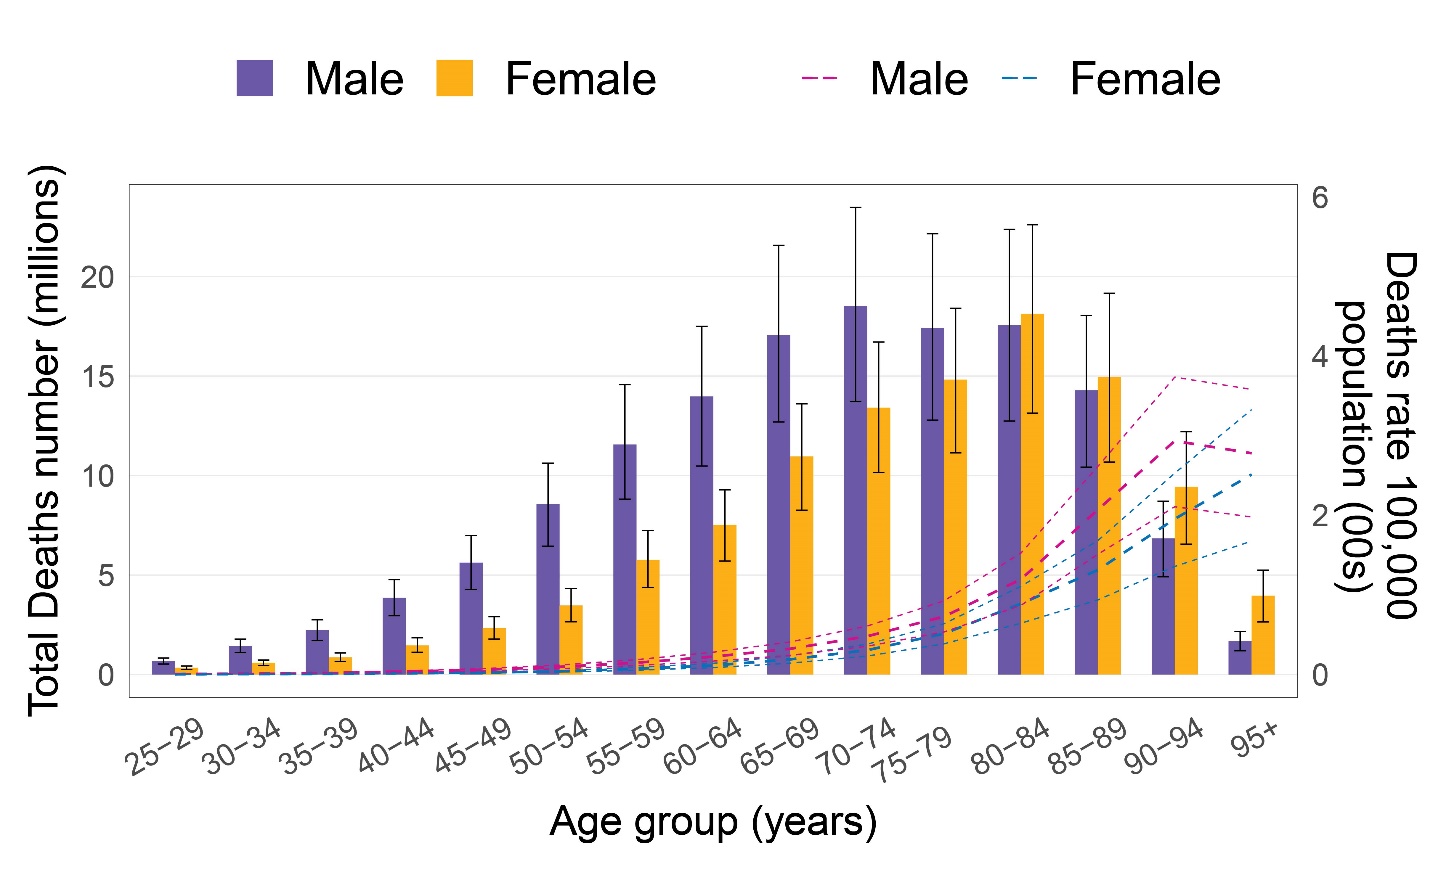


**Supplementary Figure 2.** Global mortality figures and the burden of Ischemic Heart Disease (IHD) per 100,000 population, categorized by age and gender.


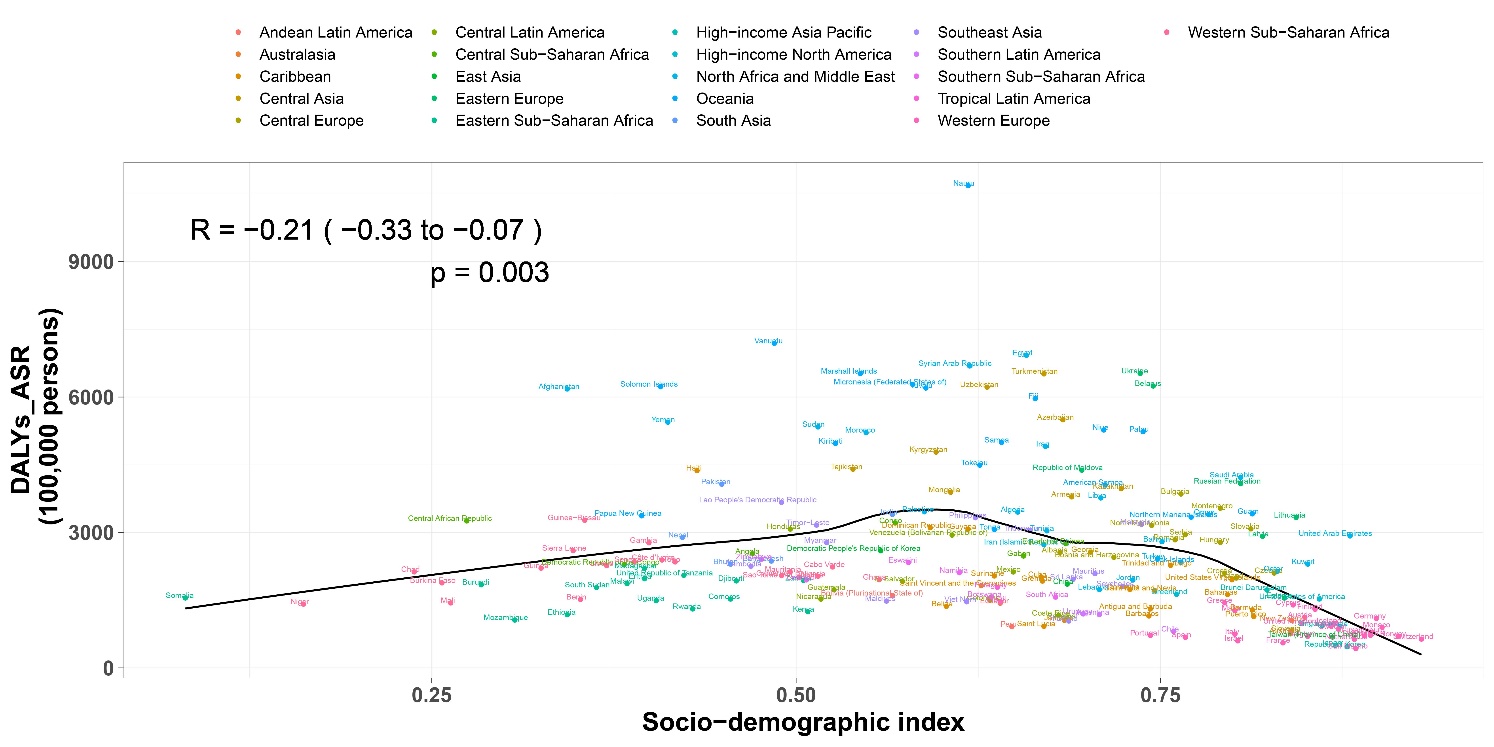


**Supplementary Figure 3.** IHD Age-standardised Disability-adjusted Life Year (DALY) rates by SDI for disease burden in 204 countries, a point is plotted for each country showing the age-standardised DALY rates observed in that county. The expected values drawn by SDI and DALYs for all regions are shown as solid lines.
